# Supplementary material for: Cysteine Protease Profiles of the Medicinal Plant Calotropis procera R. Br. Revealed by De Novo Transcriptome Analysis
Source: PubMed Central journal article supplement (PMC4365007; doi:10.1371/journal.pone.0119328), 2015-03-18
Supplement: pone.0119328.s001.pdf [file pone.0119328.s001.pdf]

**A**

|            |     | <b>E</b>              | <b>R</b> | <b>F</b> | <b>N</b> | <b>I</b>       | <b>N</b>    |             | <b>G</b> | <b>N</b> | <b>F</b> | <b>D</b> |
|------------|-----|-----------------------|----------|----------|----------|----------------|-------------|-------------|----------|----------|----------|----------|
| Papain     | (1) | FESWMLKHNKIYKNIDE     | KIYRFEI  | FKDN     | LKYIDE   | TNK            | ----        | KNNSYWLGLN  | VFAD     | MSNDEF   |          |          |
| SnuCalCp09 | (1) | FESWIEKHGKIYETIEE     | KLHRFEI  | FKEN     | LKHIDE   | RNK            | ----        | IISNYWLGLN  | FADL     | SHSHEEF  |          |          |
| SnuCalCp11 | (1) | FESWASKHGKRYKSVEE     | KLLRFEN  | FMDN     | LKHIDE   | SNKE           | ---         | ANKTYWLGLN  | FADL     | SHSHEEF  |          |          |
| SnuCalCp04 | (1) | FSLFKAKFGKSYASLEE     | HDYRLSV  | FKAN     | LRRAKRNQ | ILDP           | ----        | SAVHGVTK    | FSDL     | TPSEEF   |          |          |
| SnuCalCp07 | (1) | FSIFKKKFGKSYVSIEE     | ENYRLSV  | FKAN     | MRAQRNQE | ----           | LDPSAEHGVTQ | FSDL        | TPREF    |          |          |          |
| SnuCalCp13 | (1) | FKSFVEEYGKEYSSRKE     | YVHRLGV  | FAKN     | LLRAAEHQ | AMDP           | ----        | TAVHGVTE    | FSDL     | TEDEF    |          |          |
| SnuCalCp08 | (1) | FARFAHRYGKRYETAEE     | IKVRFDI  | FRDN     | LRMTKSH  | NKK            | ----        | GLSFSLGVNA  | FSDL     | TWEEF    |          |          |
| SnuCalCp16 | (1) | FASFALKYGKKYETDGE     | IKKRFEI  | FREN     | LWKIESH  | NKK            | ----        | GLSYTLGINE  | FSDM     | TWEEF    |          |          |
| SnuCalCp14 | (1) | FENWCREYGKTYSSQE      | KQYRHGV  | FKDN     | YDYITQH  | NSK            | ---         | GNSTCTLSLN  | FADL     | THHEF    |          |          |
| SnuCalCp18 | (1) | YEKWRSHHTVSRDLTEK     | QKRYNV   | FKAN     | ALHVYNS  | NK             | ----        | MDKPYKLLKN  | FADMT    | SHEF     |          |          |
| SnuCalCp19 | (1) | YERWRSHHTISTNLDEK     | HRRFN    | FRAN     | AHYVHEFN | NK             | ---         | DDVPYKLLKN  | FADMT    | NHEF     |          |          |
| SnuCalCp20 | (1) | HEQWMVQYGRVYKDDTE     | KASRFKI  | FKEN     | VEYIESFN | KAG            | ---         | IRSYKLGINK  | FADLT    | NEEF     |          |          |
| SnuCalCp01 | (1) | YEEWLVKHKQLHSSLGE     | KIKRFEI  | FKDN     | LRYIDE   | QNNYNKFNHKNFTL | GLNQ        | FADLT       | LDEF     |          |          |          |
| SnuCalCp10 | (1) | YEEWLVKHKQLHSNLGE     | KIKRFKI  | FKDN     | LRYIDE   | QNNYNKVNHMNFTL | GLNQ        | FADLT       | LDEF     |          |          |          |
| SnuCalCp02 | (1) | YESWLVKHGKAYNALGE     | KEKRFEI  | FKDN     | LQFIDE   | HNS            | ----        | KNLSYKLG    | LNRF     | SDLSHEEF |          |          |
| SnuCalCp05 | (1) | YEAWLVEHGKSYNGLGE     | KDKRFEI  | FKDN     | LRYIDE   | QNSV           | ---         | ANRTYKLG    | LNRF     | FADLT    | NDEY     |          |
| SnuCalCp17 | (1) | YEEWLVKHGKAYNALGE     | KSNRF    | FKDN     | LRYIDD   | HNSN           | ---         | ANRTYKLG    | LNQ      | FADLT    | NSEF     |          |
| SnuCalCp03 | (1) | YEEWIVKHGKSYNALGE     | EKFKRFEI | FKDN     | LKYIEKH  | NSL            | ---         | PNQIYKLG    | LNQ      | FSDL     | TDEF     |          |
| SnuCalCp12 | (1) | YEEWVVEYRKSVDALGVEKLR | FEI      | FKDN     | LKYMEEH  | NSL            | ---         | PNQTYKLG    | LNQ      | FSDL     | TLREF    |          |
| SnuCalCp15 | (1) | FEEWLVKHKRVYNAIGE     | KEKRFEI  | FKN      | NLKFIDE  | HNIR           | --          | YPNKTYTLGLN | VFAD     | LT       | DDEY     |          |

B

25

Papain (1) ----IPEYVDWRQKGA VTPVKNQ GSCGSCWAFSAVVTIEGIIKIR TGNLNEYSEQELLDCDRR-----SYGCNGGY PWSALQLVAQYG-IHYRNTYPYEGVQRYC  
SnuCalCp04 (1) ----LPTDFDWRDHGAVTGVK DQ GSCGSCWFSFATGALEGAHYLATGELVSLSEQQLVDCDHECDPEESGSCDSGCNGLMNNAFEYVLKAGGVVSEQTYPYTGTDTGKC  
SnuCalCp07 (1) ----LPSDFDWRDRGAVGVPVKNQ GSCGSCWFSFSTTGALEGANYLATGK FVSLSEQQLVDCDHECDPAEADSCDSGCNGLMNNAFQYTLKAGGIMREEDYPYTGTDRTGT  
SnuCalCp13 (1) ----LPENFDWRDHGAVTEVK TQGTGSCWAFSTTGAIEGANFVATGKLVSLSEQQLVDCDHACDIKDKDSCDDGCSGGLMTNAYNYLIEAGGIEEESYPTGKRGE C  
SnuCalCp06 (1) LPNQFDARTAWPQCATIGRILDQGHCGSCWAFGAVETLSDRFCIHFGMNLISLVNDLLSCCGFMCG-----NGCDGGYPLSAWKYFVYSG-VVTEECDPYFDNEGCS  
SnuCalCp08 (1) ----LPEMKDWRGTGIVSPVKDQGHCGSCWTFSTTGALEAAYTQAFKKEISLSEQQLVDCAGAFN-----NFGCRGGLPSQAF EYIKYNGGLDTEEAYPYVGNKGV C  
SnuCalCp16 (1) ----LPKSKDWRDAGIVSPVKDQGNCGSCWTFSTTGALEAAYAQA YQNI SLSEQQLLDCAGDFN-----NFGCDGG LPSQAF EYIKYSGGIETEESYPYMEKEGEC  
SnuCalCp01 (1) ----LPNSVDWRKKD VVFP I RNQ GCGSCWTFSAVASIETLIGIKEDRMIALSEQELLDCERTS-----YGCKGGYITNAFAYVAKKG-LTSREKYPYIFQQGQC  
SnuCalCp10 (1) ----LPKSVDRKKGFVLP I RNQ KCGACWAFSAVASIETLIGIKKGR TIALSEQELLDCVTAC-----DGCKAGHYDSAFAYVAKYG-ITSREKYPYVYKKGQC  
SnuCalCp03 (1) --FPVPPSVDWREK GALVPIKNQGRCGSCWAFSAVASVEALNKIKGGELISLSEQMMVDCVNAS-----YGCKGGRQTD AFKYIKVHG-IASSKDYPYVGVQGP C  
SnuCalCp12 (1) ----LPDSVDWRKRGAVLP IKNQ GCGSCWAFSAIASVEALNKIKGGDLISLSEQMLVDCVTS-----SHGCNNGRQIDAFRYMTD HG-IASSDDYPYEA VRGSC  
SnuCalCp15 (1) ----LPDFVDWRSKGIVLPIENQ GDCGSCWAFSAICSV EGIYAQRSGK LLSLSEQELVDCERR-----SYGCDGGDYSTAF EYITFFG-VSSEKSYPYTAE DGC  
SnuCalCp02 (1) ----LPKSVDWREKGA VAPVKDQ GCGSCWAFSTVGAVEGINKIVTGD LVTLSEQELVDCDNTY-----NQGCNGLMDYAF EFTTNNGGIDT EDDYPYTARDGTC  
SnuCalCp05 (1) ----LPDSVDWRKEGAVVPVKDQ GSCGSCWAFSTIASVEG I SAVVTGDLISLSEQELVDCDISY-----NEGCNGLMDYAFQFIIDNNGGIDSEEDYPYTA KDGR C  
SnuCalCp17 (1) ----LPDSVDWRKEGAVVP IKNQ GCGSCWAFSAIASVEGINAIVTGT LLSLSEQELVDCDNSGG-----NEGC SGLMDPAFEF ITENGGIDSEEDYPYKGRQGT C  
SnuCalCp09 (1) ----IPKSVDRKKGAVT P VKNQ GSCGSCWAFSTVA AVEGINQIVTGNL TSLSEQELIDCDTAY-----NNGCNGLMDYAFSFTVSNGLLHK EEDYPYLMEEGTC  
SnuCalCp11 (1) ----IPKSM DWRKRGAVGHVKNQ GPCGSCWAFSTVA AVEGINKIVTGNFTSLSEQELIDCDTS-F-----NNGCNGLMDYAFQYITQNGGLRKEEDYPYLM DQGT C  
SnuCalCp14 (1) -----MEGINKIVTGS LLSLSEQELIDCDRSY-----NSGCEGGLMDYAYK FVNNNGGIDTENDYPFQGRSGAC  
SnuCalCp18 (1) ----LPTSVDWRKQGA VTPVKNQ GRCGSCWAFSTVVGVEGINKIKTSGHLISLSEQELVDCESD-----NEGCNGLMENAYEFTK KKGITTERAYPYRARNELC  
SnuCalCp19 (1) ----VPTSIDWRQKGA VNPVKDQ GCGSCWAFSTVVA VEGIN YIKTTKLVSLSEQELVDCDNRE-----NEGCNGLMDVAF EFTMKNGGITTEQNYPYRARDGR C  
SnuCalCp20 (1) ----VPASMDWRKKGAVTGIK DQ GCGC WAFSAVAAMEGINQLTTHK LLSLSEQELVDCDTSE-----DQGCNGLMDDAFQFIISNKGLTTE SNYPYQGV DGT C

159

Papain (96) RSREK-----GPYAAKTDGVRQVQPYNEGALLYSIANQPVSVVLEAAGKDFQLYRGGI-FVGP CGNK----VDHAVA AVGY-----GPN  
SnuCalCp04 (106) SFDK-----SKVVAKVANF SVVSLDE DQIAANLVKHG PLAVGINAA--WMQTYIGGV SCPYICGKH----LDHGVLLVGYGAEGYAPIRLKEKP  
SnuCalCp07 (106) CKFDQ-----TKVAAKVANF SVVSLDE DQIAANLVKNG PLAVAINAVY--MQTYIKGV SCPYICSKR----LDHGVLLVGYGSEGYAPIRMKDKP  
SnuCalCp13 (106) KFTP-----EKVAVRLQNFTTVSGSEEQIAAHLVRNGLAVGLNAVF--MQTYIGGV SCLPICKGK---FLNHGVLLVGYGSSGFSIIRLGHKP  
SnuCalCp06 (102) HPGCEPGYPTPKCHRKCVKGNLLWKQAKHYSKRPHKIKSDPYDIMA EYVKNGPVQSFTVY-EDFAHYRSGVYKHITGSSLG----GHSV KLI GWGTS-----EDGED  
SnuCalCp08 (99) KYSS E-----NVGVRVLD SVNITLGA EDELKYAVGLLRPVSVAF EVVK-DFRHYKSGVYTSNTCGSSPMD-VNHAVLAVGYG-----VEDGIP  
SnuCalCp16 (99) KFYSG-----NVAVRVRDSFNISQGN EYDLQVAVAYIRPVSVAFQVL-EDFKQYKSGIYTSTECGSTP-EDVNHAVLAVGFG-----IENGTP  
SnuCalCp01 (96) YQ-----KEKVVKLSGYRRIPKNDEKKLQSVVAQQVSVGVKSRDFQHYRSGV-FSGACGPR----VDHAVNIVGYGS-----EGGVN  
SnuCalCp10 (96) SR-----KKKVVKLSNYKRLLRNNEGQLQIAVAQQVSVGVKATSKDFQHYRSGI-FKGACGPQ----LNHAVNIVGYGS-----EGGVN  
SnuCalCp03 (98) QP-----KEIVLKISGYRGIVRNNEKYLQIIASQQVSVSIVKVG-KDFQHYKSGI-FNGTCGDK----INHG VNVVGYGS-----ENGIP  
SnuCalCp12 (96) KN-----KKIVVKIKGYRRILPRERFLLSRASMQVSVSIVKAGSKDFQHYKSGI-FNGKCGNK----INHG VNVVGYGS-----EDGNA  
SnuCalCp15 (96) KS--D-----MIKVVQIDGYDINYNDEKALQKSVSEQVSVAVKANSVEFKLYNSGI-FSGKCGIE----SDHAVNIGYGS-----EDNVD  
SnuCalCp02 (98) DQFRK-----NARAVSIDGFEDVPKGD EQLSKKAVAHQPVSVIAIEAGGRA FQHYQSGV-FTGHCGTN----LDHGVVAVGYG-----TEDGVD  
SnuCalCp05 (98) DQYRK-----NAKVVTIDGYEDVPRNNEEALKTAASQVSVVAIEGGGRDFQLYRGGV-FTGKCGTS----LDHGVNVVGYGS-----ENGLD  
SnuCalCp17 (99) DQYRV-----NVKVVKINGYEDVPRNNEKALKKAVASQVVSAAISAGGIDFQLYESGI-YSGRYGTE----LDHG ISIVGYGS-----ENGYD  
SnuCalCp09 (98) DEKRT-----ESEVVTISGYHDPQSN EQSFLKALAHQPLSVAIEASGRDFQFYSGGV-FDGHCGETE----LDHGVAAVGYGS-----TKGLD  
SnuCalCp11 (98) EATKE-----ETDVVTISGYQDVPQND EQLL KALAHQPLSVAIEASGRDFQFYKGGI-FTGPCGSQ----LDHGVAAVGYGS-----SKGLD  
SnuCalCp14 (65) NRNKL-----KRRVVTIDGYRDPAGNENALMKAVAVQPVSVGICGSR AFQLYSGV-FTGPCSTS----LDHAVLIVGYDS-----HNGVD  
SnuCalCp18 (97) DSEKM-----NAPVVKIDGHEMVPEDDEDALMKAVANQPVSVVAIDAGSINMQFYSEGV-FTGPCGTE----LDHGVAIVGYGT-----TLDGTK  
SnuCalCp19 (98) DKNKA-----SHSAV SIDGYEDVPANNEDALLKAVANQPVSVVAIDAGGSD FQFYSEGV-FTGKCGTE----LDHGVAIVGYGT-----TVDGTK  
SnuCalCp20 (98) NSNKE-----SNSAAKITGYEDVPENSEAALLKAVANQPVSVVAIDAGSDFQFYSSGV-FTGECGTD----LDHGVTA VGYGKS-----AEDGTK

## 175

Papain (170) YILIKNSWGTGWGENGYIRIKRGTGNSYGVCGLYTSSFYYPV  
SnuCalCp04 (189) YWLIKNSWGENWGEEGYKICRG----RNVCGVDSMVSTVA  
SnuCalCp07 (190) YWLIKNSWGEHWGENGFYKICRG----RNVCGVDSMVSTVA  
SnuCalCp13 (190) YWIMKNSWGKRWGEHGYYRMCRCG----HNMCGINTMVSADV  
SnuCalCp06 (200) YWLLANQWNKSWGDEGYFMIKRG----TNECGIEDSVVSGM  
SnuCalCp08 (180) YWLIKNSWGASWGDNGYFKMEMG----KNMCGVSTCASFPV  
SnuCalCp16 (180) YWLIKNSWGTDFGIHGYFMMEMG----KNMCGVATCASFPF  
SnuCalCp01 (171) YWIVRNSWGTNWGENGYMRIIPRNSNQSGGYCGIAYQAAYPV  
SnuCalCp10 (171) YWIVRNSWGTGWGEKGYMRIILRNSKQSEGYCGIAMKPSFPV  
SnuCalCp03 (172) YWIVRNSWGKGWGEQGYIRMRNIRDPAAGCCGVAITPTFPV  
SnuCalCp12 (171) YWIVRNSWGEKWGEQGYMRMPRNIRKSEGYCGIALRPSLPV  
SnuCalCp15 (172) YWIVRNSWGTDWGENGYMRIIRNTKDPQGHCGIADEPSYPV  
SnuCalCp02 (176) YWIVRNSWGPKWGEAGYIKLERNVHGNTGKCGIAMEPSYPV  
SnuCalCp05 (176) YWIVRNSWGPSWGENGYIRMQRNVASSSGLCGIAIEPSYPI  
SnuCalCp17 (177) YWILRNSWGTKWGEDGYMRLRRNVPESSGHCQIATLPSYPI  
SnuCalCp09 (176) YIIVKNSWGPKWGEKGYIRMKRNTGKPEGICGINKMASYPT  
SnuCalCp11 (176) YIIVRNSWGSTWGERGYIRMQRNTGNHEGLCGINKMASYPV  
SnuCalCp14 (143) YWIVKNSWGTSWGIEGYAYMARNTGNSEGVCGINMLASYPV  
SnuCalCp18 (176) YWIVKNSWGTWEGEGGYIRMVRGSHAEGGICGIAKEASYPV  
SnuCalCp19 (177) YWIVRNSWGPWGEKGYIRMHRGINAKEGLCGIAMQPSYPI  
SnuCalCp20 (178) YWLVKNSWGTSWGGEN-----
